# Supplementary material for: Association of SLC22A1, SLC22A2, SLC47A1, and SLC47A2 Polymorphisms with Metformin Efficacy in Type 2 Diabetic Patients
Source: MDPI journal article supplement (doi:10.3390/biomedicines10102546), 2022-10-12
Supplement: s1 [file s1]

**Table S1.** Baseline characteristics of the participants in this study.

| Variables                 | Whole Cohort ( <i>n</i> = 82) |
|---------------------------|-------------------------------|
| Male                      | 38 (46.3%)                    |
| Age(years)                | 49.80 ± 12.18                 |
| BMI (kg/m <sup>2</sup> )  | 24.34 ± 3.62                  |
| FPG (mmol/L)              | 10.6 ± 3.2                    |
| HbA1c (%)                 | 8.4 ± 2.1                     |
| FINS (μU/mL)              | 12.4 ± 9.3                    |
| <i>SLC22A1</i> rs628031   |                               |
| GG                        | 49 (59.8%)                    |
| GA                        | 32 (39.0%)                    |
| AA                        | 1 (1.2%)                      |
| <i>SLC22A2</i> rs316019   |                               |
| AC                        | 36(43.9%)                     |
| CC                        | 46(56.1%)                     |
| <i>SLC47A1</i> rs2289669  |                               |
| AA                        | 5(6.1%)                       |
| AG                        | 65 (79.3%)                    |
| GG                        | 12 (14.6%)                    |
| <i>SLC47A2</i> rs12943590 |                               |
| GG                        | 29(35.4%)                     |
| AG                        | 39(47.6%)                     |
| AA                        | 14(17.1%)                     |

Continuous variables were expressed as mean ± SD and analyzed using t-test. Categorical variables were expressed as *n* (%) and compared using the Pearson  $\chi^2$ -test.

**Table S2.** Comparison of baseline characteristics of different genotypes of *SLC22A1* rs628031 and *SLC22A2* rs316019.

| Baseline Characteristics | Groups  | <i>SLC22A1</i> rs628031 |               | <i>p</i> Value | <i>SLC22A2</i> rs316019 |               | <i>p</i> value |
|--------------------------|---------|-------------------------|---------------|----------------|-------------------------|---------------|----------------|
|                          |         | GG                      | GA/AA         |                | AC                      | CC            |                |
| Sex                      |         |                         |               | 0.749          |                         |               | 0.557          |
|                          | Male    | 22                      | 16            |                | 18                      | 20            |                |
|                          | Female  | 27                      | 17            |                | 18                      | 26            |                |
| Age                      | —       | 51.45 ± 10.88           | 48.48 ± 10.76 | 0.295          | 52.25 ± 10.36           | 48.98 ± 11.09 | 0.176          |
| Educational level        |         |                         |               | 0.887          |                         |               | 0.209          |
|                          | Level A | 32                      | 21            |                | 26                      | 27            |                |
|                          | Level B | 13                      | 9             |                | 6                       | 16            |                |
|                          | Level C | 3                       | 3             |                | 3                       | 3             |                |
| Smoking                  |         |                         |               | 0.709          |                         |               | 0.053          |
|                          | Yes     | 13                      | 10            |                | 14                      | 9             |                |
|                          | None    | 36                      | 23            |                | 7                       | 22            |                |
| Alcohol drink            |         |                         |               | 0.025          |                         |               | 0.588          |
|                          | Yes     | 1                       | 5             |                | 2                       | 4             |                |
|                          | None    | 48                      | 28            |                | 34                      | 42            |                |
| Tea drink                |         |                         |               | 0.281          |                         |               | 0.740          |
|                          | Yes     | 30                      | 24            |                | 23                      | 31            |                |
|                          | None    | 19                      | 9             |                | 13                      | 15            |                |
| Sweet                    |         |                         |               | 0.073          |                         |               | 0.664          |

|             |      |               |               |       |               |               |       |
|-------------|------|---------------|---------------|-------|---------------|---------------|-------|
|             | Yes  | 23            | 9             |       | 15            | 21            |       |
|             | None | 26            | 24            |       | 17            | 29            |       |
| TC(mmol/L)  | —    | 5.23 ± 1.84   | 5.58 ± 1.48   | 0.368 | 5.23 ± 2.17   | 5.48 ± 1.24   | 0.539 |
| TG(mmol/L)  | —    | 2.68 ± 2.08   | 3.02 ± 2.01   | 0.469 | 2.79 ± 2.15   | 2.84 ± 1.98   | 0.911 |
| HDL(mmol/L) | —    | 1.29 ± 0.42   | 1.20 ± 0.32   | 0.299 | 1.28 ± 0.39   | 1.23 ± 0.38   | 0.615 |
| LDL(mmol/L) | —    | 3.26 ± 0.93   | 3.26 ± 0.83   | 0.983 | 3.42 ± 0.81   | 3.13 ± 0.93   | 0.148 |
| ALT(U/L)    | —    | 36.56 ± 21.21 | 37.76 ± 24.32 | 0.815 | 36.97 ± 24.81 | 37.11 ± 20.53 | 0.978 |
| AST(U/L)    | —    | 29.00 ± 14.79 | 28.36 ± 16.33 | 0.856 | 30.28 ± 15.80 | 27.51 ± 15.03 | 0.423 |
| Cr(μmol/L)  | —    | 72.54 ± 16.96 | 73.61 ± 22.25 | 0.808 | 74.84 ± 16.65 | 71.43 ± 21.00 | 0.431 |
| Bun(mmol/L) | —    | 5.02 ± 1.38   | 5.38 ± 1.42   | 0.273 | 5.17 ± 1.54   | 5.15 ± 1.29   | 0.950 |

Continuous variables were expressed as mean ± SD and analyzed using t-test. Categorical variables were expressed as N (%) and compared using the Pearson  $\chi^2$ -test. When the sample size was less than 40 or the theoretical frequency was less than 5, Fisher exact test was used. Genetic associations were tested using a t-test. Level A, Junior secondary and below. Level B, High School / Technical Secondary School. Level C, University and above.

**Table S3.** Comparison of baseline characteristics of different genotypes of *SLC47A1* rs2289669 and *SLC47A2* rs12943590.

| Baseline Characteristics | Groups  | <i>SLC47A1</i> rs2289669 |               |                | <i>SLC47A2</i> rs12943590 |               |               |                |
|--------------------------|---------|--------------------------|---------------|----------------|---------------------------|---------------|---------------|----------------|
|                          |         | AA/GG                    | AG            | <i>p</i> value | GG                        | AG            | AA            | <i>p</i> value |
| Sex                      |         |                          |               | 0.631          |                           |               |               | 0.118          |
|                          | Male    | 7                        | 31            |                | 12                        | 16            | 10            |                |
|                          | Female  | 10                       | 34            |                | 17                        | 23            | 4             |                |
| Age<br>a                 | —       | 52.29 ± 10.37            | 49.92 ± 10.97 | 0.425          | 48.10 ± 9.42              | 52.92 ± 11.68 | 48.21 ± 10.26 | 0.136          |
| Educational level        |         |                          |               | 0.350          |                           |               |               | 0.464          |
|                          | Level A | 13                       | 40            |                | 12                        | 26            | 15            |                |
|                          | Level B | 4                        | 18            |                | 1                         | 13            | 8             |                |
|                          | Level C | 0                        | 6             |                | 1                         | 3             | 2             |                |
| Smoking                  |         |                          |               | 0.888          |                           |               |               | 0.027          |
|                          | Yes     | 5                        | 18            |                | 7                         | 8             | 8             |                |
|                          | None    | 12                       | 47            |                | 22                        | 31            | 6             |                |
| Alcohol drink            |         |                          |               | 0.193          |                           |               |               | 0.438          |
|                          | Yes     | 0                        | 6             |                | 1                         | 3             | 2             |                |
|                          | None    | 17                       | 59            |                | 28                        | 36            | 12            |                |
| Tea drink                |         |                          |               |                |                           |               |               | 0.521          |
|                          | Yes     | 11                       | 43            | 0.911          | 17                        | 28            | 9             |                |
|                          | None    | 6                        | 22            |                | 12                        | 11            | 5             |                |
| Sweet                    |         |                          |               | 0.060          |                           |               |               | 0.263          |
|                          | Yes     | 10                       | 22            |                | 11                        | 18            | 3             |                |
|                          | None    | 7                        | 43            |                | 18                        | 21            | 11            |                |
| TC(mmol/L)               | —       | 4.77 ± 2.12              | 5.53 ± 1.55   | 0.103          | 5.34 ± 1.77               | 5.35 ± 1.75   | 5.49 ± 1.50   | 0.960          |
| TG(mmol/L)               | —       | 3.08 ± 2.09              | 2.75 ± 2.05   | 0.559          | 2.64 ± 1.98               | 2.69 ± 1.92   | 3.51 ± 2.51   | 0.377          |
| HDL(mmol/L)              | —       | 1.37 ± 0.40              | 1.22 ± 0.38   | 0.169          | 1.22 ± 0.37               | 1.33 ± 0.42   | 1.10 ± 0.20   | 0.150          |
| LDL(mmol/L)              | —       | 3.41 ± 0.95              | 3.22 ± 0.87   | 0.446          | 3.47 ± 1.06               | 3.11 ± 0.72   | 3.25 ± 0.92   | 0.271          |
| ALT(U/l)                 | —       | 40.50 ± 26.48            | 36.20 ± 21.41 | 0.495          | 36.35 ± 26.25             | 36.18 ± 20.35 | 40.86 ± 20.08 | 0.787          |
| AST(U/l)                 | —       | 34.69 ± 17.83            | 27.28 ± 14.45 | 0.084          | 28.48 ± 19.16             | 27.68 ± 11.68 | 32.14 ± 15.95 | 0.651          |
| Cr(μmol/l)               | —       | 73.29 ± 17.43            | 72.88 ±       | 0.941          | 67.43 ±                   | 73.75 ± 16.22 | 81.90 ± 23.87 | 0.063          |

|             |   |             |             |       |             |             |             |       |
|-------------|---|-------------|-------------|-------|-------------|-------------|-------------|-------|
|             |   |             | 19.65       |       | 19.00       |             |             |       |
| Bun(mmol/l) | — | 5.15 ± 1.07 | 5.17 ± 1.48 | 0.973 | 4.73 ± 1.32 | 5.35 ± 1.24 | 5.57 ± 1.88 | 0.114 |

Continuous variables were expressed as mean ± SD and analyzed using t-test. Categorical variables were expressed as N (%) and compared using the Pearson  $\chi^2$ -test. When the sample size was less than 40 or the theoretical frequency was less than 5, Fisher exact test was used. Genetic associations were tested using a t-test. Level A, Junior secondary and below. Level B, High School / Technical Secondary School. Level C, University and above.

**Table S4.** Genotypes of *SLC22A1* rs628031 on the effect of metformin efficacy in subgroup analysis.

| Variables <sup>a</sup>       | Normal Weight Group |                     |         |         | Overweight Group    |                     |         |         |
|------------------------------|---------------------|---------------------|---------|---------|---------------------|---------------------|---------|---------|
|                              | GG                  | GA/AA               | F Value | p Value | GG                  | GA/AA               | F Value | p Value |
| $\Delta 30_{\text{FPG}}$     | -0.2 ± 0.2,(24)     | -0.3 ± 0.2,(11)     | 0.54    | 0.4690  | -0.2 ± 0.2,(23)     | -0.3 ± 0.2,(21)     | 3.93    | 0.0541  |
| $\Delta 60_{\text{FPG}}$     | -0.2 ± 0.3,(24)     | -0.4 ± 0.2,(11)     | 2.47    | 0.1256  | -0.4 ± 0.2,(23)     | -0.5 ± 0.2,(21)     | 2.02    | 0.1630  |
| $\Delta(60-30)_{\text{FPG}}$ | -0.025 ± 0.151,(24) | -0.112 ± 0.137,(11) | 4.84    | 0.0344  | -0.137 ± 0.136,(23) | -0.115 ± 0.201,(21) | 0.18    | 0.6723  |
| $\Delta 60_{\text{HbA1c}}$   | -0.146 ± 0.217,(25) | -0.131 ± 0.170,(12) | 0.05    | 0.8300  | -0.194 ± 0.151,(24) | -0.246 ± 0.157,(21) | 1.30    | 0.2604  |
| $\Delta 60_{\text{FINS}}$    | -0.192 ± 0.390,(22) | 0.055 ± 0.595,(11)  | 2.06    | 0.1615  | -0.163 ± 0.474,(22) | 0.063 ± 0.558,(21)  | 2.07    | 0.1577  |
| $\Delta 60_{\text{HOMA-IR}}$ | -0.393 ± 0.478,(22) | -0.331 ± 0.686,(11) | 0.09    | 0.7641  | -0.504 ± 0.446,(22) | -0.395 ± 0.567,(21) | 0.49    | 0.4876  |
| $\Delta 60_{\text{HOMA-IS}}$ | 0.237 ± 0.793,(22)  | 0.731 ± 0.565,(11)  | 3.38    | 0.0755  | 0.440 ± 0.637,(22)  | 0.859 ± 0.715,(21)  | 4.14    | 0.0483  |

<sup>a</sup>Continuous variables were expressed as mean ± SD, (N) and analyzed using t-test. Non-normally distributed variables, such as FINS, HOMA-IR, and HOMA-IS, were converted to normally distributed variables and analyzed. Genetic associations were tested using regression analysis.

**Table S5.** Genotypes of *SLC22A2* rs316019 on the effect of metformin efficacy in subgroup analysis.

| Variables <sup>a</sup>       | Normal Weight Group |                     |         |         | Overweight Group    |                     |         |         |
|------------------------------|---------------------|---------------------|---------|---------|---------------------|---------------------|---------|---------|
|                              | AC                  | CC                  | F Value | p Value | AC                  | CC                  | F Value | p Value |
| $\Delta 30_{\text{FPG}}$     | -0.3 ± 0.2,(15)     | -0.2 ± 0.2,(20)     | 0.21    | 0.6472  | -0.3 ± 0.2,(21)     | -0.3 ± 0.2,(23)     | 1.03    | 0.3164  |
| $\Delta 60_{\text{FPG}}$     | -0.3 ± 0.3,(15)     | -0.3 ± 0.2,(20)     | 0.89    | 0.3532  | -0.4 ± 0.2,(21)     | -0.5 ± 0.2,(23)     | 2.35    | 0.1327  |
| $\Delta(60-30)_{\text{FPG}}$ | -0.080 ± 0.140,(15) | -0.031 ± 0.158,(20) | 1.45    | 0.2371  | -0.106 ± 0.139,(21) | -0.145 ± 0.193,(23) | 0.59    | 0.4464  |
| $\Delta 60_{\text{HbA1c}}$   | -0.162 ± 0.207,(15) | -0.127 ± 0.200,(22) | 0.20    | 0.6585  | -0.215 ± 0.153,(21) | -0.222 ± 0.158,(24) | 0.02    | 0.8788  |
| $\Delta 60_{\text{FINS}}$    | -0.140 ± 0.499,(15) | -0.083 ± 0.465,(18) | 0.12    | 0.7357  | -0.192 ± 0.433,(20) | 0.069 ± 0.573,(23)  | 2.78    | 0.1032  |
| $\Delta 60_{\text{HOMA-IR}}$ | -0.477 ± 0.558,(15) | -0.285 ± 0.536,(18) | 1.00    | 0.3241  | -0.536 ± 0.417,(20) | -0.377 ± 0.571,(23) | 1.06    | 0.3087  |
| $\Delta 60_{\text{HOMA-IS}}$ | 0.588 ± 0.935,(15)  | 0.247 ± 0.543,(18)  | 1.71    | 0.2009  | 0.403 ± 0.578,(20)  | 0.854 ± 0.742,(23)  | 4.83    | 0.0336  |

<sup>a</sup>Continuous variables were expressed as mean ± SD, (N) and analyzed using t-test. Non-normally distributed variables, such as FINS, HOMA-IR, and HOMA-IS, were converted to normally distributed variables and analyzed. Genetic associations were tested using regression analysis.

**Table S6.** Genotypes of *SLC47A2* rs12943590 on the effect of metformin efficacy in subgroup analysis.

| Variables <sup>a</sup>       | Normal Weight Group |                     |                    |         |         | Overweight Group    |                     |                    |         |         |
|------------------------------|---------------------|---------------------|--------------------|---------|---------|---------------------|---------------------|--------------------|---------|---------|
|                              | GG                  | AG                  | AA                 | F Value | p Value | GG                  | AG                  | AA                 | F Value | p Value |
| $\Delta 30_{\text{FPG}}$     | -0.2 ± 0.1,(12)     | -0.3 ± 0.2,(15)     | -0.3 ± 0.2,(8)     | 2.12    | 0.1371  | -0.2 ± 0.1,(15)     | -0.3 ± 0.2,(23)     | -0.3 ± 0.2,(6)     | 0.64    | 0.5320  |
| $\Delta 60_{\text{FPG}}$     | -0.2 ± 0.2,(12)     | -0.3 ± 0.2,(15)     | -0.4 ± 0.4,(8)     | 0.49    | 0.6189  | -0.3 ± 0.2,(15)     | -0.4 ± 0.2,(23)     | -0.5 ± 0.2,(6)     | 1.20    | 0.3105  |
| $\Delta(60-30)_{\text{FPG}}$ | -0.086 ± 0.117,(12) | -0.040 ± 0.138,(15) | -0.024 ± 0.218,(8) | 1.46    | 0.2450  | -0.112 ± 0.149,(15) | -0.122 ± 0.188,(23) | -0.181 ± 0.151,(6) | 0.36    | 0.6983  |
| $\Delta 60_{\text{HbA1c}}$   | -0.065 ± 0.135,(13) | -0.165 ± 0.151,(16) | -0.219 ± 0.329,(8) | 1.73    | 0.1931  | -0.221 ± 0.182,(16) | -0.214 ± 0.149,(23) | -0.230 ± 0.112,(6) | 0.03    | 0.9714  |
| $\Delta 60_{\text{FINS}}$    | 0.115 ± 0.464,(11)  | -0.185 ± 0.431,(16) | -0.319 ± 0.519,(6) | 2.17    | 0.1320  | 0.072 ± 0.496,(16)  | -0.194 ± 0.494,(21) | 0.110 ± 0.648,(6)  | 1.56    | 0.2237  |
| $\Delta 60_{\text{HOMA-IR}}$ | -0.125 ± 0.444,(11) | -0.456 ± 0.514,(16) | -0.603 ± 0.704,(6) | 1.97    | 0.1568  | -0.265 ± 0.513,(16) | -0.609 ± 0.439,(21) | -0.395 ± 0.607,(6) | 2.28    | 0.1158  |
| $\Delta 60_{\text{HOMA-IS}}$ | 0.517 ± 0.580,(11)  | 0.278 ± 0.603,(16)  | 0.521 ± 1.334,(6)  | 0.40    | 0.6709  | 0.693 ± 0.606,(16)  | 0.498 ± 0.722,(21)  | 1.030 ± 0.815,(6)  | 1.44    | 0.2500  |

<sup>a</sup>Continuous variables were expressed as mean ± SD, (N) and analyzed using t-test. Non-normally distributed variables, such as FINS, HOMA-IR, and HOMA-IS, were converted to normally distributed variables and analyzed. Genetic associations were tested using regression analysis.
